# Supplementary material
Source: PubMed Central journal article supplement (PMC6643568)
Supplement: ao7b01303_si_001.pdf [file ao7b01303_si_001.pdf]

# Hybrid protein-glycosaminoglycan hydrogels promote chondrogenic stem cell differentiation

*Vladimíra Moulisová<sup>1,†</sup>; Sara Poveda-Reyes<sup>2,†</sup>; Esther Sanmartín-Masiá<sup>2</sup>; Luis Quintanilla-Sierra<sup>3,4</sup>; Manuel Salmerón-Sánchez<sup>1,\*</sup>; Gloria Gallego Ferrer<sup>2,4,\*</sup>*

<sup>1</sup>Division of Biomedical Engineering, School of Engineering, University of Glasgow, Rankine Bld, Oakfield Av. G12 8LT, Glasgow, United Kingdom

<sup>2</sup>Centre for Biomaterials and Tissue Engineering (CBIT), Universitat Politècnica de València, Camino de Vera s/n. 46022, Valencia, Spain

<sup>3</sup>BIOFORGE Group, Centro de Investigación Científica y Desarrollo Tecnológico, Universidad de Valladolid, Campus Migue Delibes 47011, Valladolid, Spain

<sup>4</sup>Biomedical Research Networking Center in Bioengineering, Biomaterials and Nanomedicine (CIBER-BBN), Instituto de Salud Carlos III, C/ Monforte de Lemos 3-5, pabellón 11, planta 0, 28029, Madrid, Spain

<sup>†</sup>Equal contribution to this work

\*Corresponding authors. E-mail: [Manuel.Salmeron-Sanchez@glasgow.ac.uk](mailto:Manuel.Salmeron-Sanchez@glasgow.ac.uk) (Manuel Salmerón-Sánchez); [ggallego@ter.upv.es](mailto:ggallego@ter.upv.es) (Gloria Gallego Ferrer)

# Supporting Information

## S.1 Mechanical properties

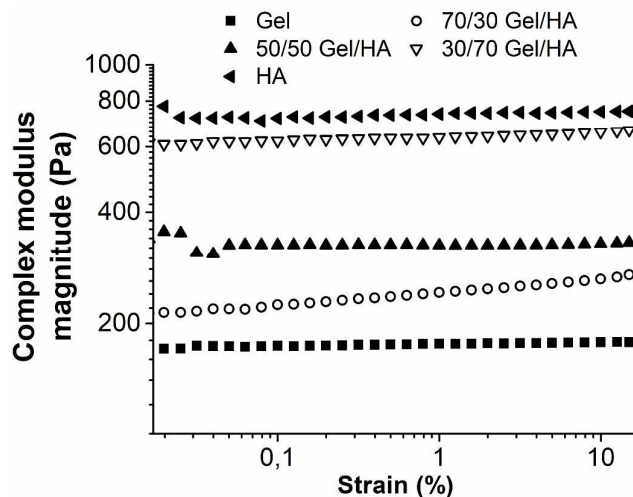

**Figure S1.** Rheometric complex modulus magnitude ( $|G^*|$ ) of crosslinked hydrogels as a function of the strain at a frequency of 1 Hz at 37°C. Each curve corresponds to the average of three different samples.

## S.2 Live/Dead

The viability of the cells in the injectable Gel/HA hydrogels was evaluated in a culture using the Live/Dead kit for mammalian cells. After 14 days the samples were washed with DPBS and incubated for 15 min at 37 °C in DPBS with 1  $\mu$ M of calcein AM and 2  $\mu$ M ethidium homodimer-1 (EthD-1). An in vivo analysis of live (stained in green with calcein AM) and dead cells (stained in red with EthD-1) was then performed with a Zeiss Observer Z1\_AX10 fluorescence microscope. Several images were taken from two different replicates of each sample. The resulting images shown in Figure S2 were representative of the whole sample.

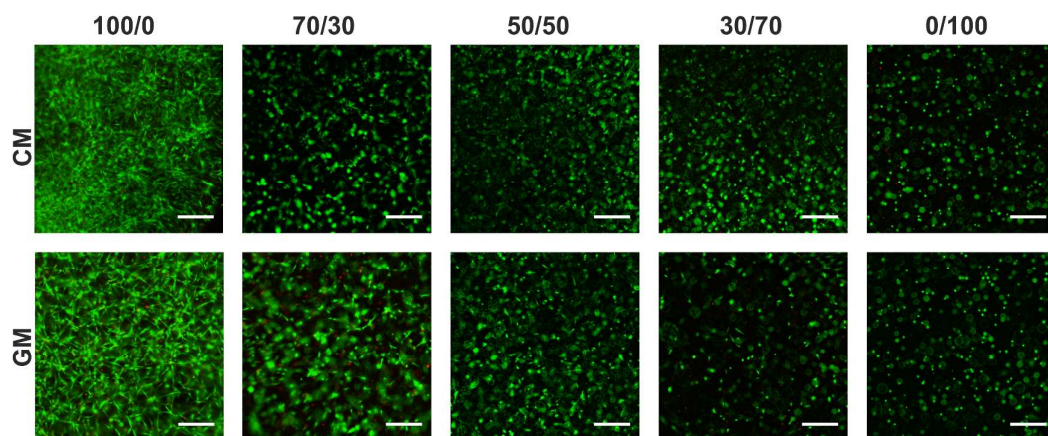

**Figure S2.** Live/dead images of BM-hMSCs cells cultured within Gel/HA hydrogels in GM and CM for 14 days. Scale bar 300  $\mu\text{m}$ .

### S.3 Optical microscopy observation of cells encapsulated into the hydrogels

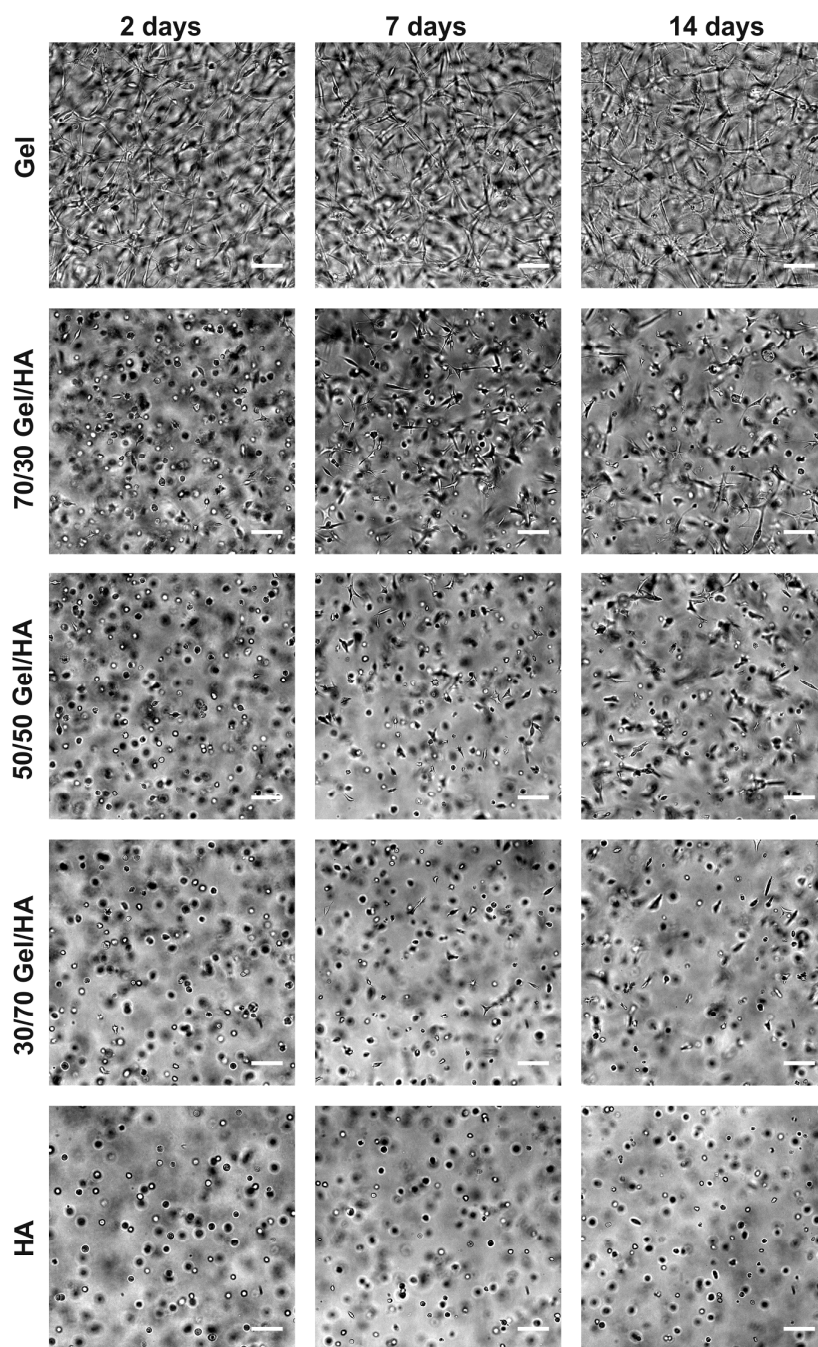

**Figure S3.1.** Phase contrast images of Gel/HA hydrogels cultured in GM for 2, 7 and 14 days. Scale bar 100  $\mu\text{m}$ .

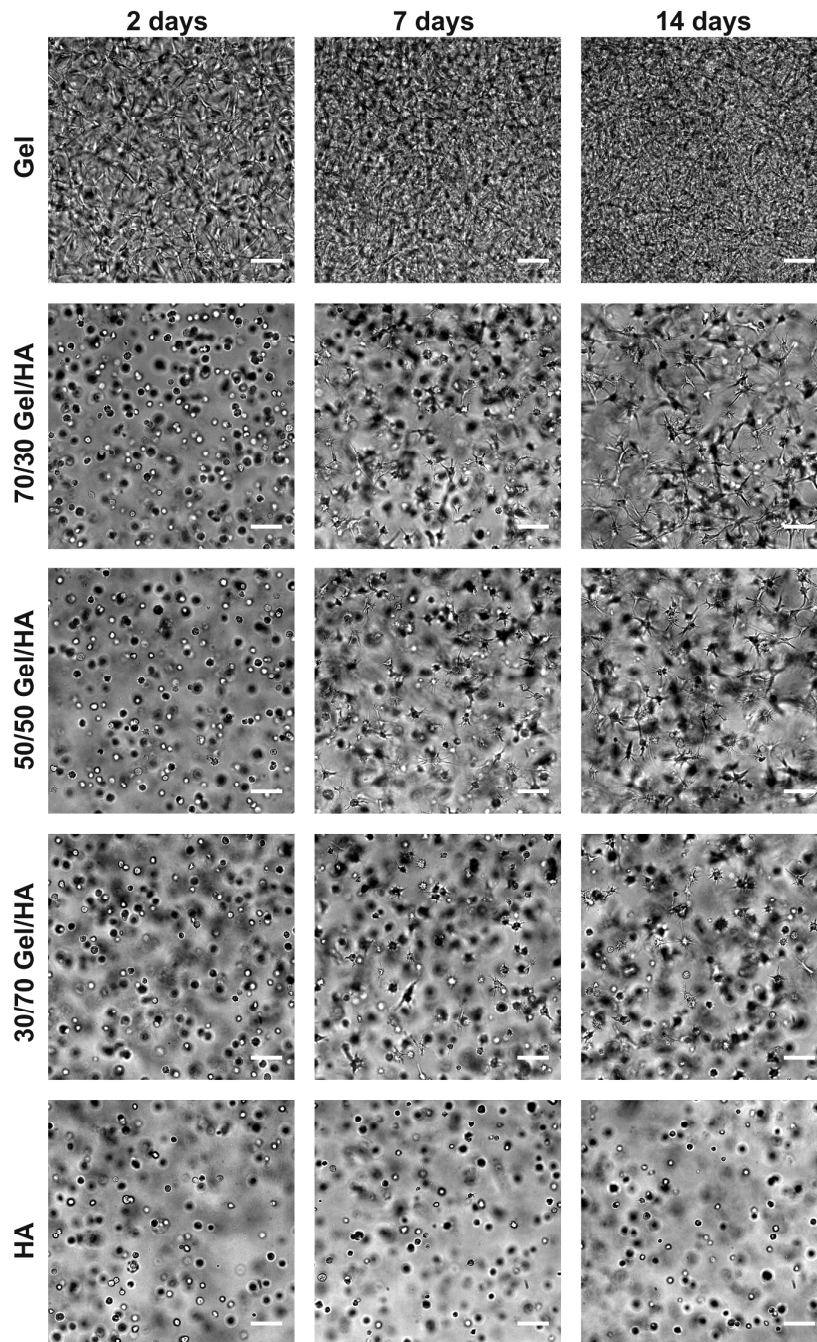

**Figure S3.2.** Phase contrast images of Gel/HA hydrogels cultured in CM for 2, 7 and 14 days. Scale bar 100  $\mu\text{m}$ .

#### S.4 Immunofluorescence study

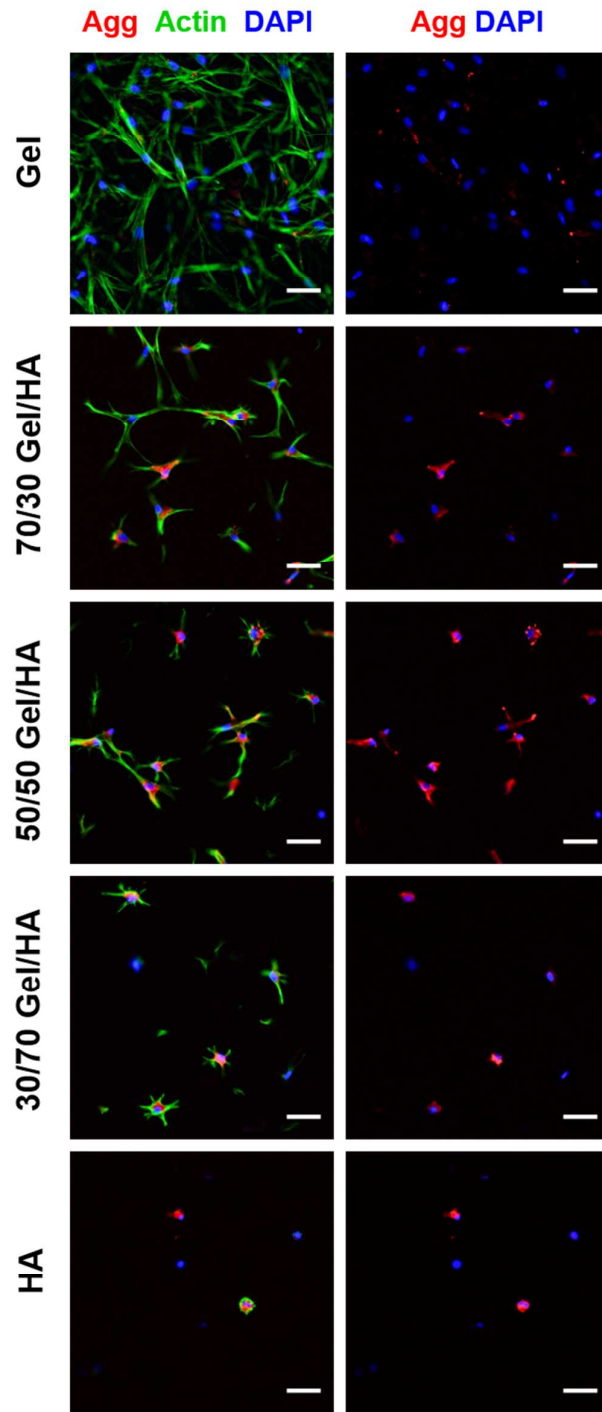

**Figure S4.1.** Immunofluorescence images for Aggrecan of BM-hMSCs cultured in Gel/HA hydrogels and in CM for 14 days. Nuclei are stained with DAPI, cytoskeleton is stained in green and Aggrecan is stained in red. Scale bar 50  $\mu$ m.

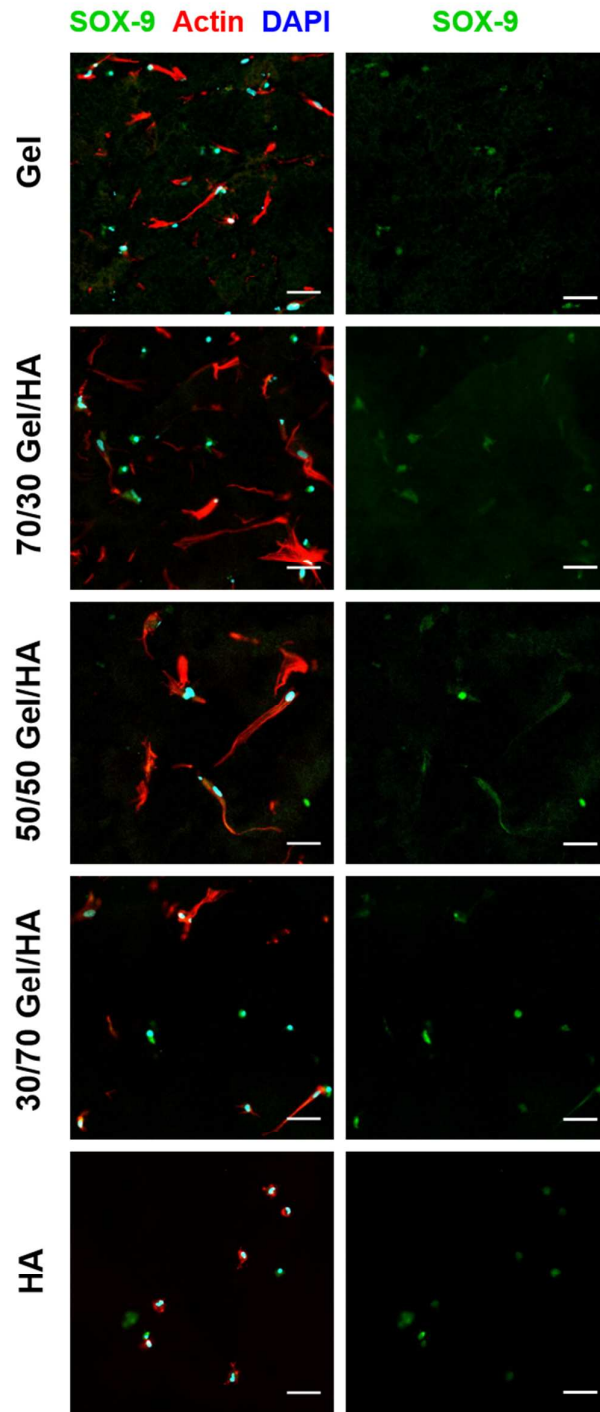

**Figure S4.2.** Immunofluorescence images for SOX-9 of BM-hMSCs cultured in Gel/HA hydrogels and in CM for 14 days. Nuclei are stained with DAPI, cytoskeleton is stained in red and SOX-9 is stained in green. Scale bar 50  $\mu$ m.

## S.5 Cell distribution and Blue Level/Area from Alcian Blue histologies

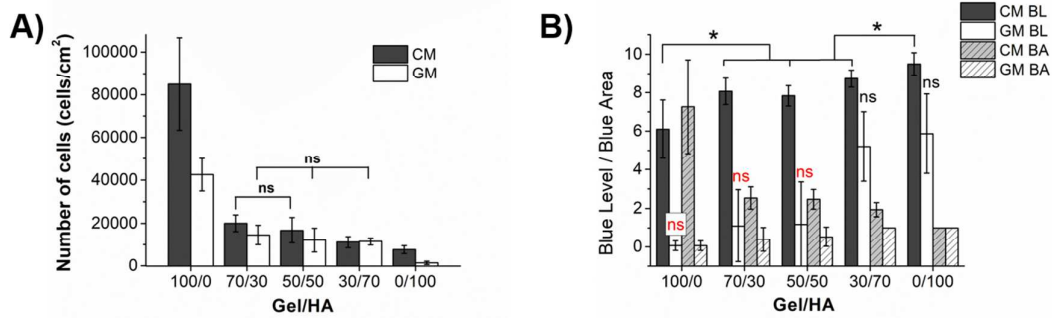

**Figure S5.** Quantification of the cell cultures of BM-hMSCs encapsulated in the Gel/HA hydrogels and cultured in growth medium (GM) and chondrogenic medium (CM) for 14 days. **A)** Total number of cells/cm<sup>2</sup> obtained from the immunofluorescence images of aggrecan. Mann-Whitney-Wilconson test demonstrated that groups within a type of culture medium show statistically significant differences between each other, except those marked with “ns”. **B)** dark blue level (BL) and blue area (BA) around the cells in alcian blue images. Mann-Whitney-Wilconson test was performed to find statistical differences, \* for p<0.05 and “ns” for not significant differences.
